# Supplementary material
Source: publisher figshare collection journal article supplement (https://sage.figshare.com/ndownloader/files/26342709)
Supplement: Supplementary file 1 [file 26342709]

**Supplementary document**

**1. Model diagnostic test for Phase 1**

*Table 1. Collinearity Diagnostics for Phase 1 core model*

| **Variables** | **VIF** | **SQRT VIF** | **Tolerance** | **R-Squared** | **Eigenval** | **Cond Index** |
| --- | --- | --- | --- | --- | --- | --- |
| Superstition | 1.49 | 1.22 | 0.6703 | 0.3297 | 1 6.2736 | 1 |
| Political stability | 1.98 | 1.41 | 0.5045 | 0.4955 | 2 1.6422 | 1.9545 |
| Growth rate | 1.73 | 1.32 | 0.5772 | 0.4228 | 3 0.8361 | 2.7393 |
| GINI | 1.75 | 1.32 | 0.5721 | 0.4279 | 4 0.4623 | 3.6837 |
| Collectivism | 2.88 | 1.7 | 0.3475 | 0.6525 | 5 0.3576 | 4.1883 |
| Cremation | 1.85 | 1.36 | 0.5418 | 0.4582 | 6 0.2578 | 4.9332 |
| Death rate | 1.69 | 1.3 | 0.5924 | 0.4076 | 7 0.0858 | 8.55 |
| Population density | 1.17 | 1.08 | 0.8558 | 0.1442 | 8 0.0582 | 10.3861 |
| Muslim majority | 1.81 | 1.35 | 0.5521 | 0.4479 | 9 0.0181 | 18.6188 |
|  |  |  |  |  | 10 0.0083 | 27.5474 |
| Mean VIF | 1.82 |  | Condition Number: 27.5474 | | | |

*Table 2. Proportional Reduction in Error results of the Phase 1 logistic regression model*

Dependent variable: PROBLEM EXISTS

Model reduces errors in the prediction of Problem_exists2 by **61.70%**

| Predicted Values of PROBLEM EXISTS | Actual values of PROBLEM EXISTS | |  |
| --- | --- | --- | --- |
| 0 | 1 | Total |
| 0 | 62 | 9 | 71 |
| 1 | 9 | 38 | 47 |
| Total | 71 | 47 | 118 |

Model predicts Problem_exists=0 correctly **87%** of the time

Model predicts Problem_exists=1 correctly **81%** of the time

**2. Model diagnostic test for Phase 2**

*Table 3. Collinearity Diagnostics for Phase 2 model*

| **Variables** | **VIF** | **SQRT VIF** | **Tolerance** | **R-Squared** | **Eigenval** | **Cond Index** |
| --- | --- | --- | --- | --- | --- | --- |
| Regulatory quality | 2.36 | 1.54 | 0.4235 | 0.5765 | 4.3284 | 1 |
| Government integrity | 1.72 | 1.31 | 0.5827 | 0.4173 | 1.4015 | 1.7574 |
| Funeral costs | 1.69 | 1.3 | 0.5922 | 0.4078 | 0.6694 | 2.5428 |
| Land shortage | 1.3 | 1.14 | 0.767 | 0.233 | 0.3568 | 3.4829 |
| Collectivist pressure | 1.72 | 1.31 | 0.5818 | 0.4182 | 0.1635 | 5.1452 |
| Cremation | 1.62 | 1.27 | 0.616 | 0.384 | 0.06 | 8.4963 |
|  |  |  |  |  | 0.0204 | 14.5651 |
| Mean VIF | 1.74 |  | Condition Number: 14.5651 | | | |

**3. The list of case countries**

|  | **Case country** | **ISO code** |
| --- | --- | --- |
| 1 | Afghanistan | AFG |
| 2 | Albania | ALB |
| 3 | Argentina | ARG |
| 4 | Armenia | ARM |
| 5 | Austria | AUT |
| 6 | Azerbaijan | AZE |
| 7 | Burundi | BDI |
| 8 | Belgium | BEL |
| 9 | Benin | BEN |
| 10 | Bangladesh | BGD |
| 11 | Bulgaria | BGR |
| 12 | Bosnia and Herzegovina | BIH |
| 13 | Belarus | BLR |
| 14 | Bolivia | BOL |
| 15 | Brazil | BRA |
| 16 | Bhutan | BTN |
| 17 | Botswana | BWA |
| 18 | Switzerland | CHE |
| 19 | Chile | CHL |
| 20 | China | CHN |
| 21 | Cote d'Ivoire | CIV |
| 22 | Cameroon | CMR |
| 23 | Congo (Kinshasa) | COD |
| 24 | Colombia | COL |
| 25 | Costa Rica | CRI |
| 26 | Czech Republic | CZE |
| 27 | Germany | DEU |
| 28 | Denmark | DNK |
| 29 | Dominican Republic | DOM |
| 30 | Algeria | DZA |
| 31 | Ecuador | ECU |
| 32 | Egypt | EGY |
| 33 | Spain | ESP |
| 34 | Estonia | EST |
| 35 | Ethiopia | ETH |
| 36 | Finland | FIN |
| 37 | France | FRA |
| 38 | United Kingdom | GBR |
| 39 | Georgia | GEO |
| 40 | Ghana | GHA |
| 41 | Guinea-Bissau | GNB |
| 42 | Greece | GRC |
| 43 | Guatemala | GTM |
| 44 | Hong Kong | HKG |
| 45 | Honduras | HND |
| 46 | Croatia | HRV |
| 47 | Hungary | HUN |
| 48 | Indonesia | IDN |
| 49 | India | IND |
| 50 | Ireland | IRL |
| 51 | Iran | IRN |
| 52 | Iraq | IRQ |
| 53 | Italy | ITA |
| 54 | Jordan | JOR |
| 55 | Japan | JPN |
| 56 | Kazakhstan | KAZ |
| 57 | Kenya | KEN |
| 58 | Kyrgyzstan | KGZ |
| 59 | Cambodia | KHM |
| 60 | Korea, Rep. | KOR |
| 61 | Lao PDR | LAO |
| 62 | Lebanon | LBN |
| 63 | Sri Lanka | LKA |
| 64 | Lithuania | LTU |
| 65 | Latvia | LVA |
| 66 | Morocco | MAR |
| 67 | Moldova | MDA |
| 68 | Maldives | MDV |
| 69 | Mexico | MEX |
| 70 | Mali | MLI |
| 71 | Myanmar | MMR |
| 72 | Mongolia | MNG |
| 73 | Mozambique | MOZ |
| 74 | Malawi | MWI |
| 75 | Malaysia | MYS |
| 76 | Niger | NER |
| 77 | Nigeria | NGA |
| 78 | Nicaragua | NIC |
| 79 | Netherlands | NLD |
| 80 | Norway | NOR |
| 81 | Nepal | NPL |
| 82 | Pakistan | PAK |
| 83 | Panama | PAN |
| 84 | Peru | PER |
| 85 | Philippines | PHL |
| 86 | Poland | POL |
| 87 | Puerto Rico | PRI |
| 88 | Portugal | PRT |
| 89 | Paraguay | PRY |
| 90 | Palestinian Territories | PSE |
| 91 | Romania | ROU |
| 92 | Russia | RUS |
| 93 | Rwanda | RWA |
| 94 | Senegal | SEN |
| 95 | Singapore | SGP |
| 96 | El Salvador | SLV |
| 97 | Serbia | SRB |
| 98 | Slovak Republic | SVK |
| 99 | Sweden | SWE |
| 100 | Eswatini | SWZ |
| 101 | Chad | TCD |
| 102 | Taiwan | TWN |
| 103 | Thailand | THA |
| 104 | Tajikistan | TJK |
| 105 | Turkmenistan | TKM |
| 106 | Tunisia | TUN |
| 107 | Turkey | TUR |
| 108 | Tanzania | TZA |
| 109 | Uganda | UGA |
| 110 | Ukraine | UKR |
| 111 | Uruguay | URY |
| 112 | United States | USA |
| 113 | Uzbekistan | UZB |
| 114 | Vietnam | VNM |
| 115 | Kosovo | XKX |
| 116 | South Africa | ZAF |
| 117 | Zambia | ZMB |
| 118 | Zimbabwe | ZWE |
